# Supplementary material
Source: PubMed Central journal article supplement (PMC6628887)
Supplement: NIHMS1529757-supplement-Supplementary_Table_1.pdf [file NIHMS1529757-supplement-Supplementary_Table_1.pdf]

**Supplementary Table 1. Sequences of oligonucleotides used in biochemical assays**

|                                                                                                |               |
|------------------------------------------------------------------------------------------------|---------------|
| d(TGGTCUGGAT)                                                                                  | Fig. 1a-c     |
| <sup>32</sup> P-d(CTTCTGGTCUGGATGGTAGT)                                                        | Fig. 1d       |
| FAM-d(CGGGCGGCGGCAUAGGGCGCGGCCTTTTT)-Cy5                                                       | Fig. 1e, 3c-e |
| <sup>32</sup> P-d(ATGACTCTTCTGGTCUGGATGGTAGTTAAGT)<br>d(GACCAGAAGAGTCAT)<br>d(ACTTAACTACCATCC) | Fig. 4d-e     |
| FAM-d(ATGACTCTTCTGGTC(THF)GGATGGTAGTTAAGT)<br>d(GACCAGAAGAGTCAT)<br>d(ACTTAACTACCATCC)         | Fig. S4       |
