# Supplementary material
Source: PubMed Central journal article supplement (PMC6628887)

Figure 1a

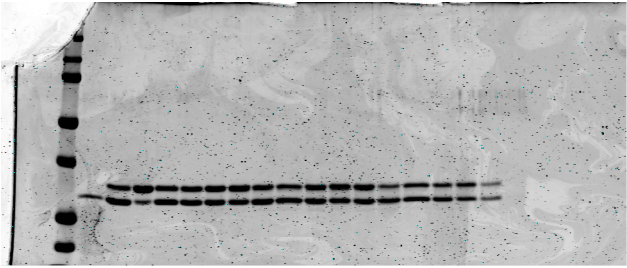

Figure 1b

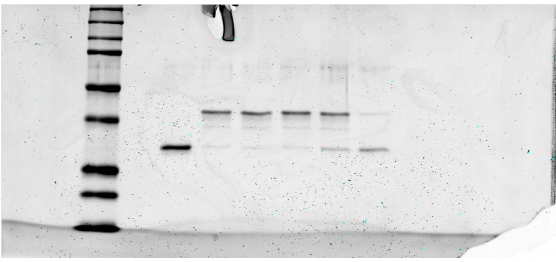

Figure 1d

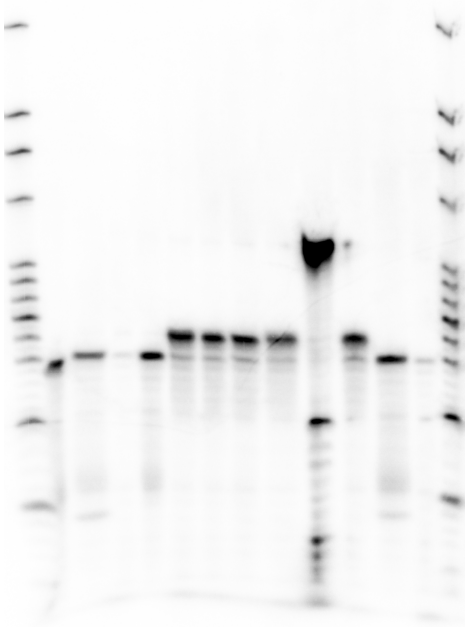

Figure 1e

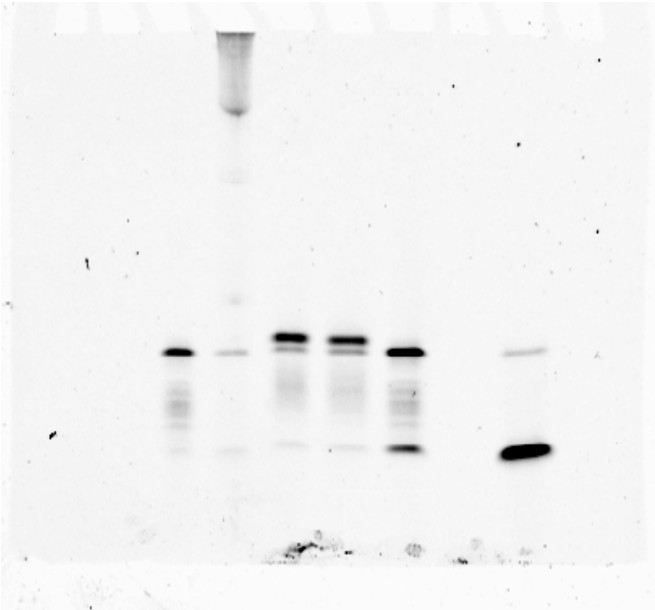

Figure 3c

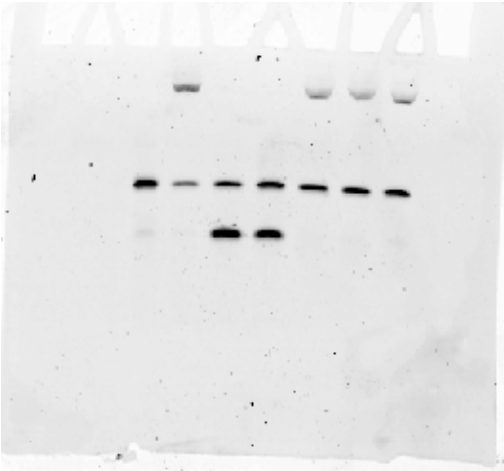

Figure 3e

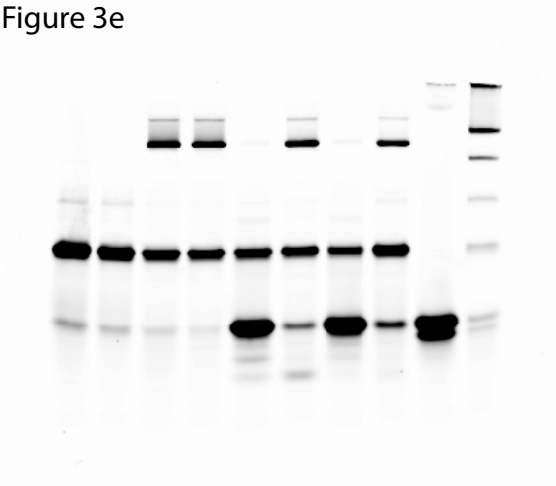

Figure 4d

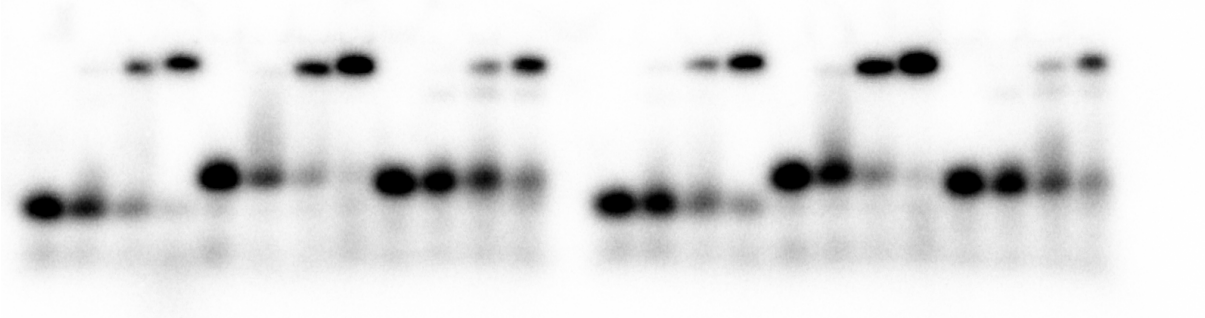

Supplement: NIHMS1529757-supplement-Supplementary_Data_set_1.pdf [file NIHMS1529757-supplement-Supplementary_Data_set_1.pdf]
